# Supplementary figures and images for: Heparin-Binding Protein 17/Fibroblast Growth Factor-Binding Protein-1 Knockout Inhibits Proliferation and Induces Differentiation of Squamous Cell Carcinoma Cells
Source: MDPI journal article supplement (doi:10.3390/cancers13112684), 2021-05-29

Figure S1 Shintani T et. al.

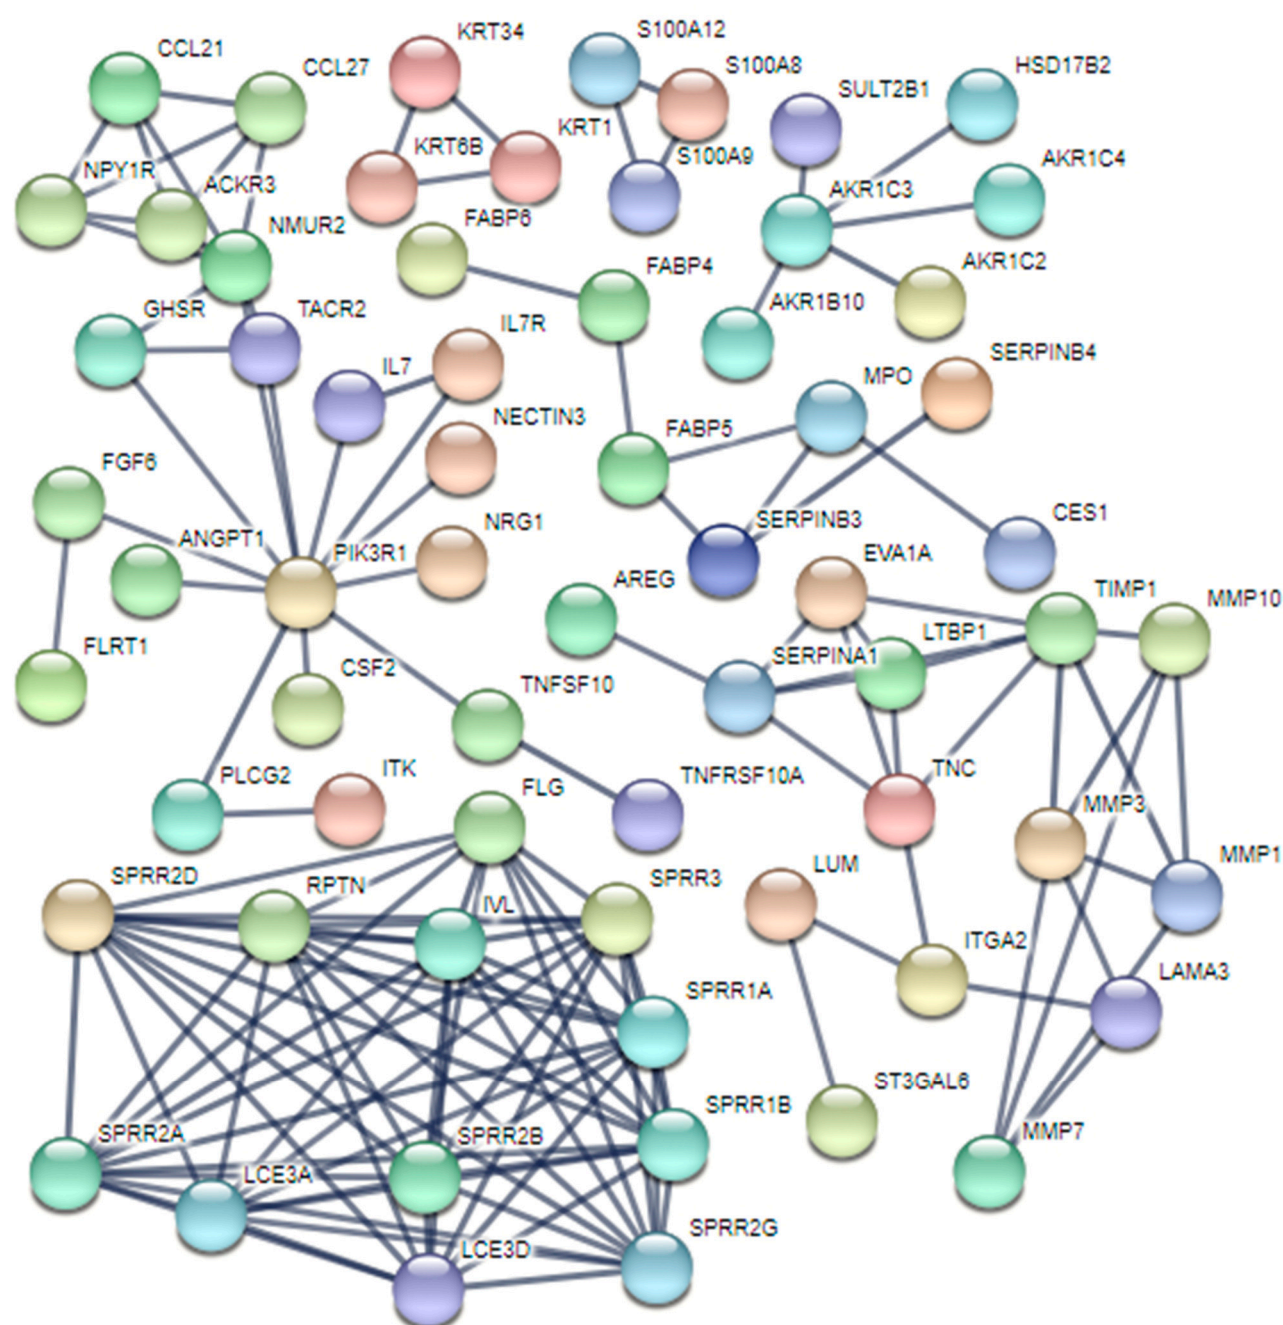

Figure S2 Shintani T et. al.

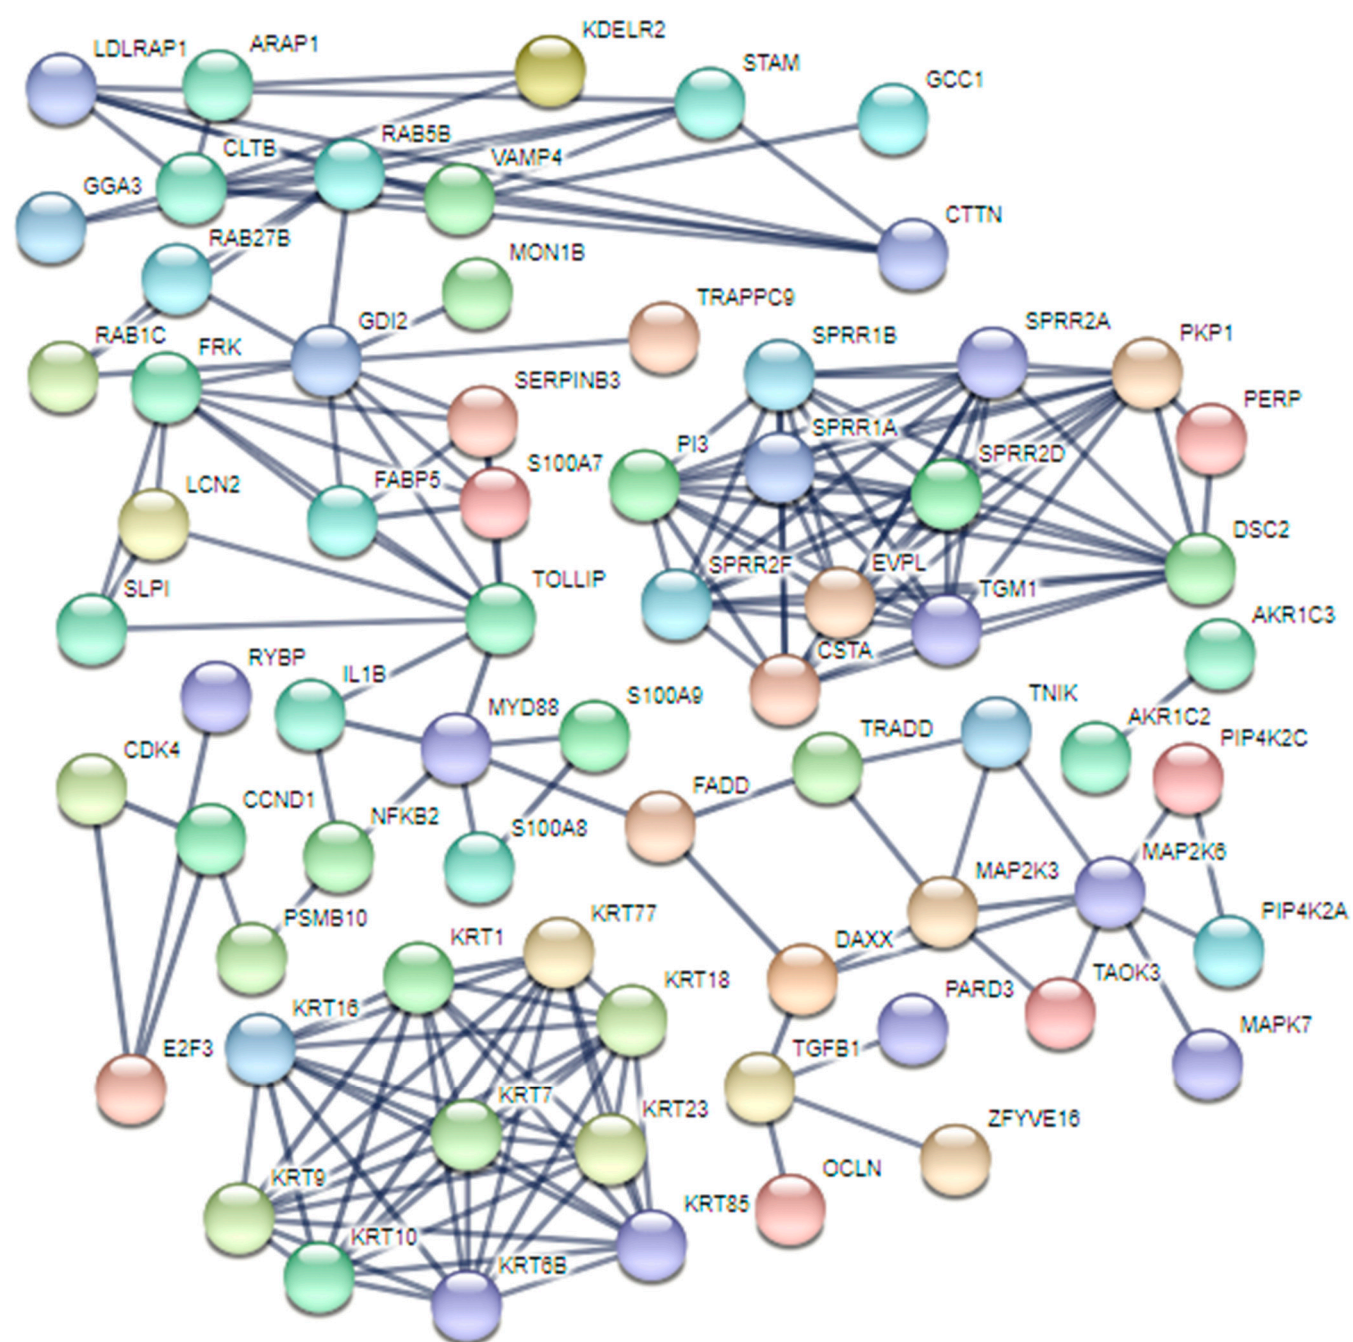

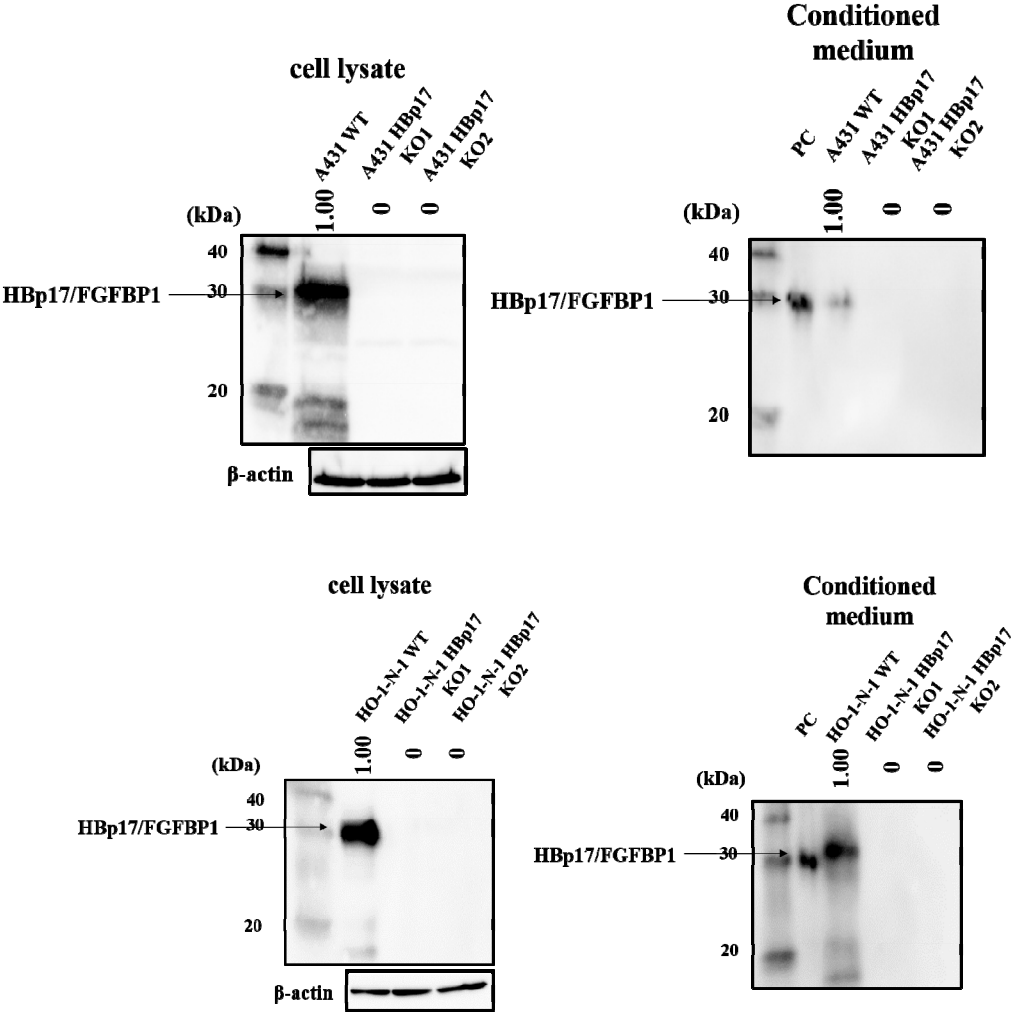

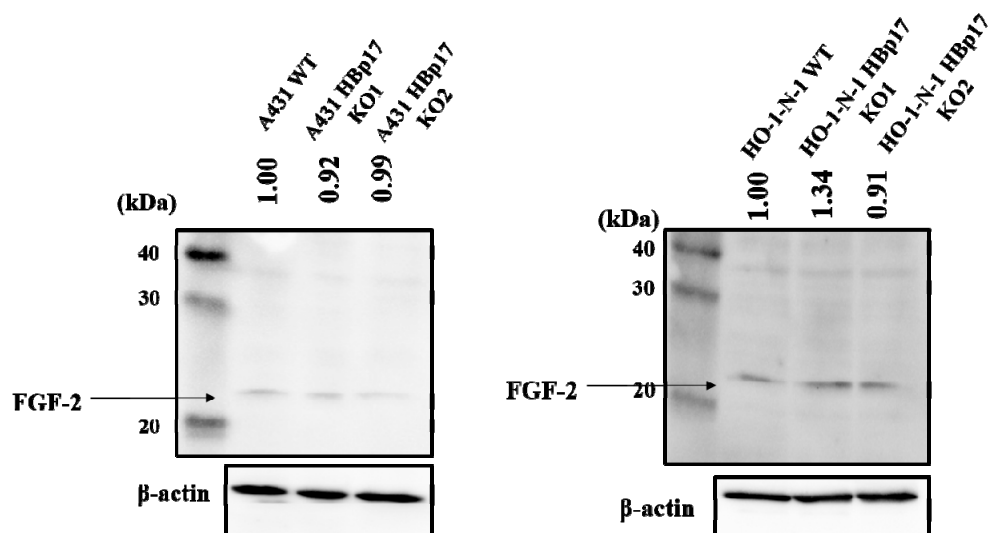

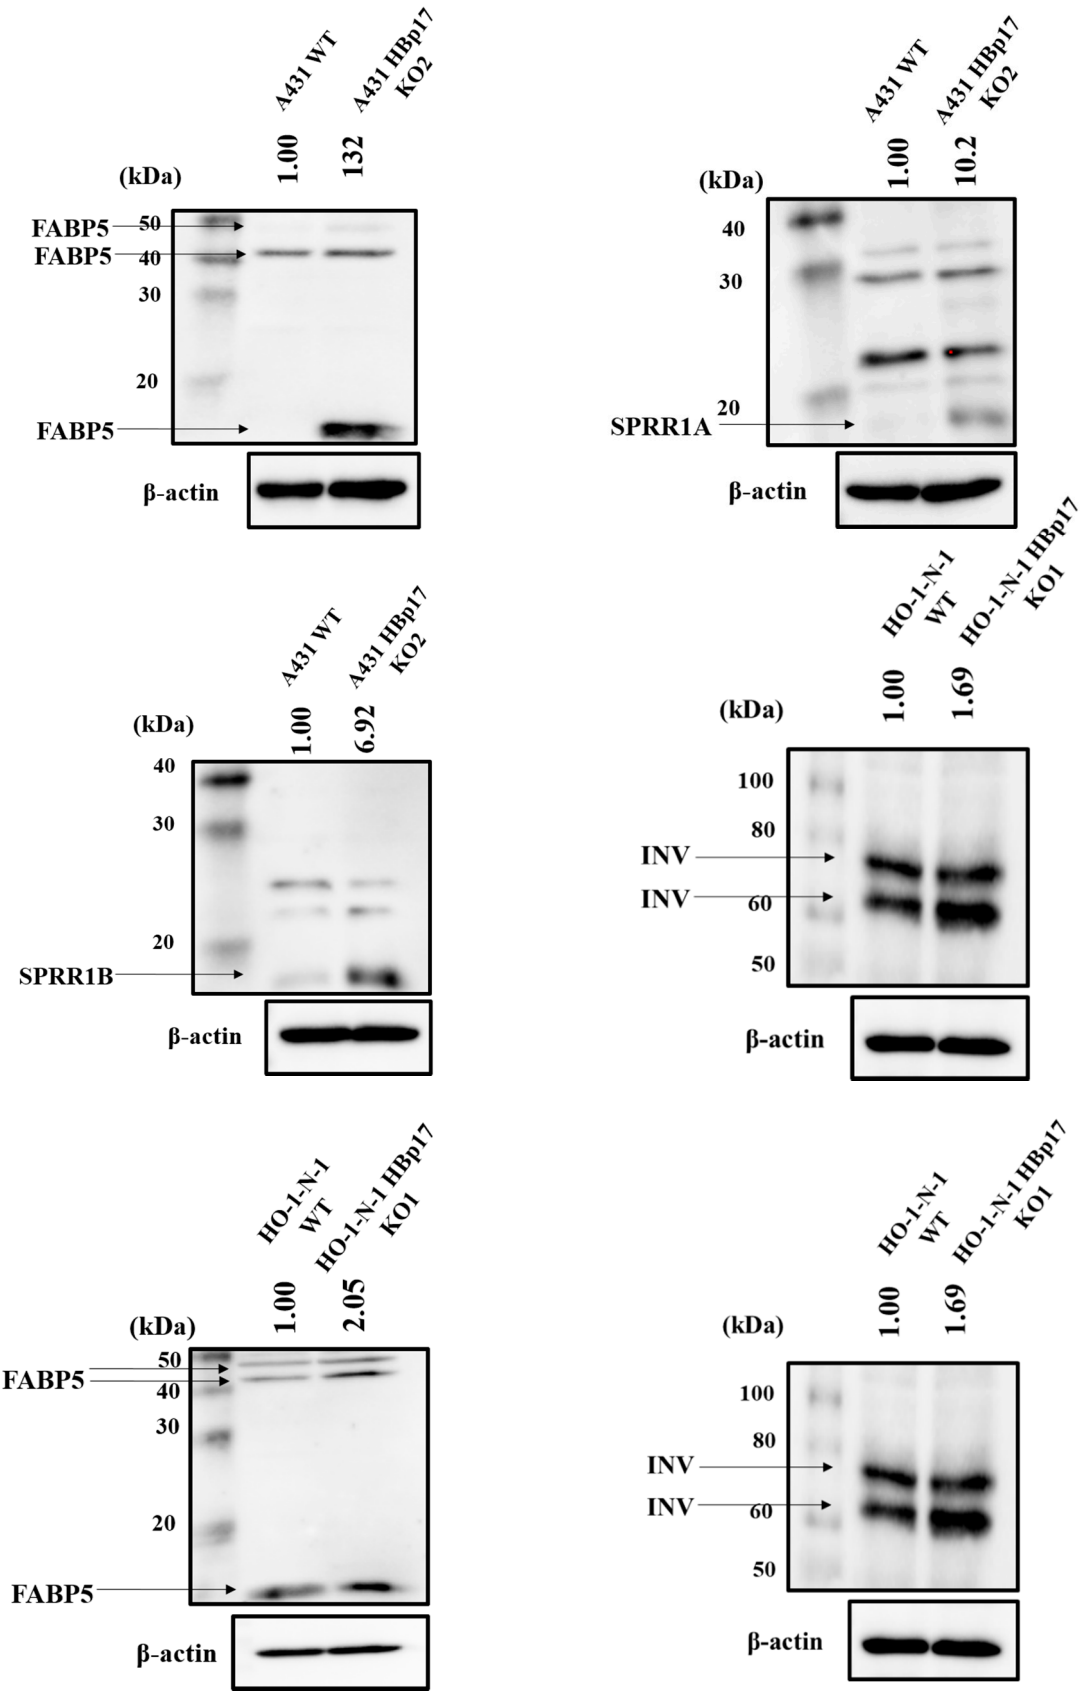

Supplement: s1 [file s1]
